# Supplementary material for: Multiplatform analyses reveal distinct drivers of systemic pathogenesis in adult versus pediatric severe acute COVID-19
Source: PubMed Central journal article supplement (PMC10073144; doi:10.1038/s41467-023-37269-3), 2023-04-04
Supplement: 41467_2023_37269_MOESM1_ESM.pdf [file 41467_2023_37269_MOESM1_ESM.pdf]

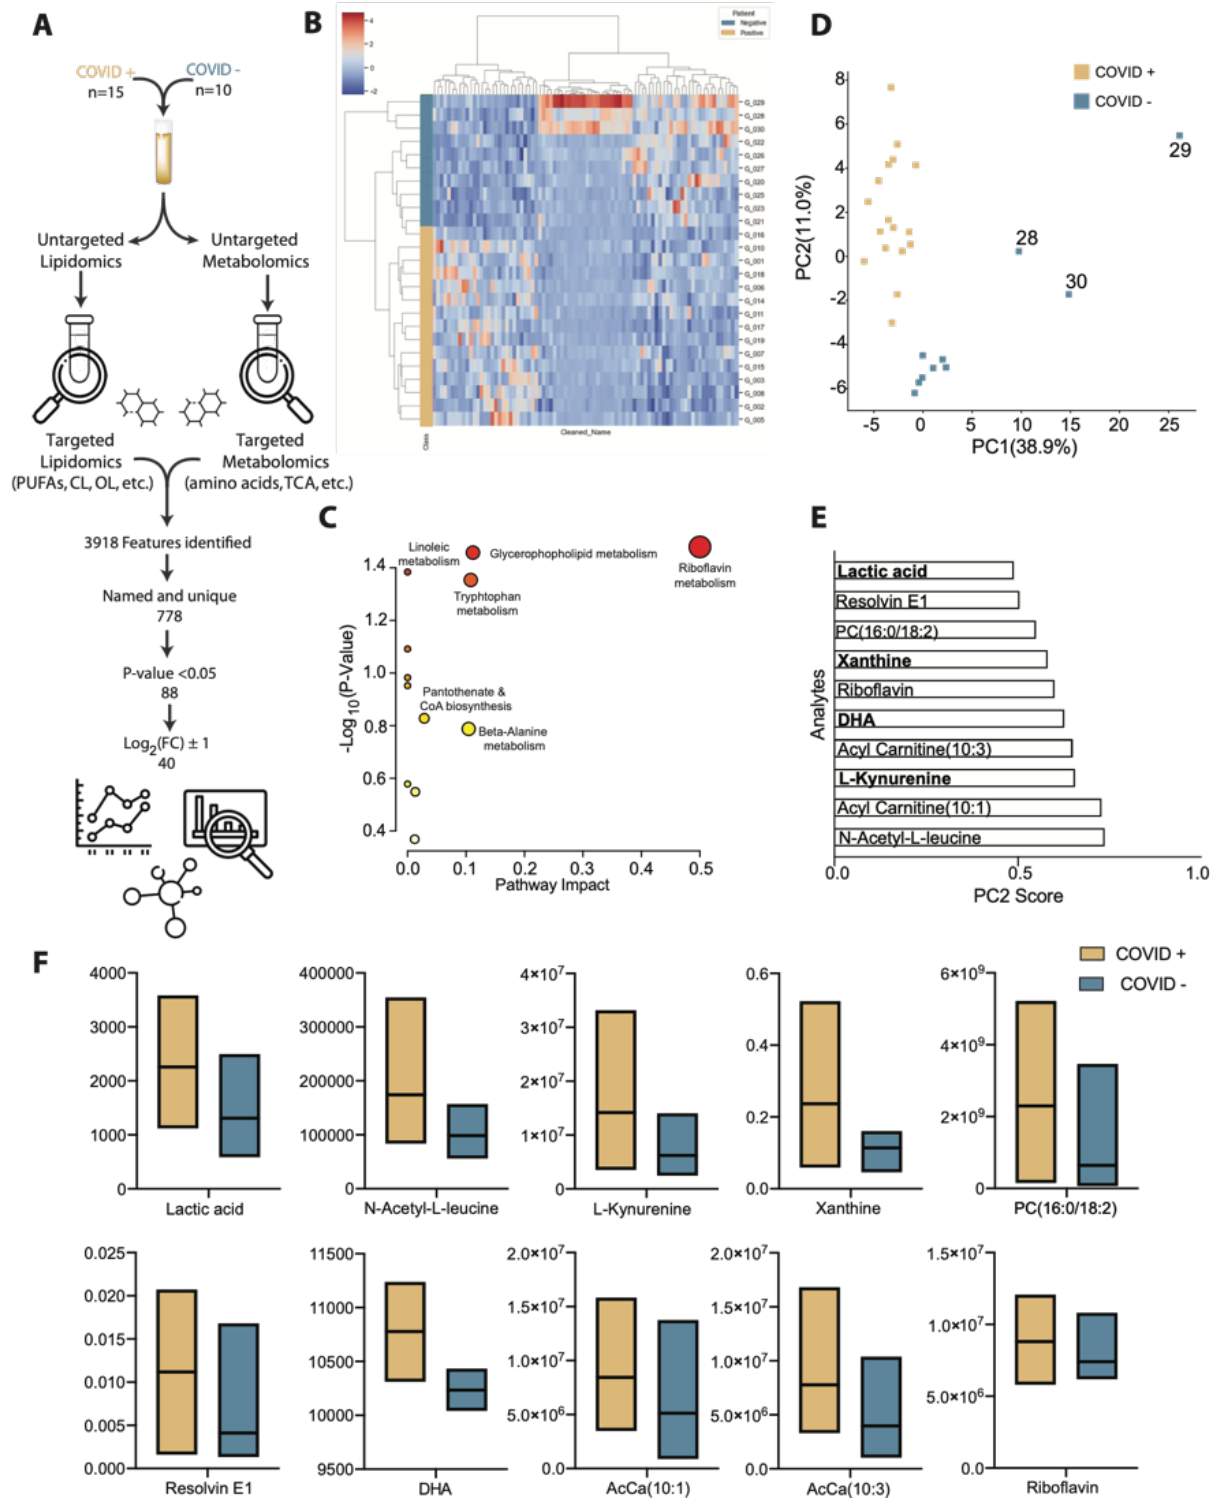

**Supplementary Figure 1. Lipidomics and metabolomics analyses of adult cohort reveal alterations in Lactic acid, Xanthine, DHA and L-Kynurenine in COVID-19, consistent with findings from previous reports.** A.) Workflow showing the targeted and untargeted assays used to interrogate lipid and metabolite changes occurring in COVID-19 patients (COVID+) compared to non-COVID patients (COVID-). B.) Heatmap with unbiased hierarchical clustering using significant analytes from COVID+ versus COVID- adults. C.) Bubble plot of analytes mapped to KEGG pathways using metaboanalyst (Fisher exact test). D.) Principal component analysis (PCA) using statistically significant metabolites. E.) and F.) Top 10 analytes that define separation of principal component two with abundances as determined by mass spectrometry analysis. Shown in box plots are the minima and maxima values as well as the mean of all measurements (COVID+ n=15; COVID- n=10). Source data are provided as a Source Data file.

**Supplementary Table 1. Patient Demographics for Adult Multiomics Studies, n=25.**

|                                                                                 | COVID Cohort, n=15 | Non-COVID Cohort, n=10 |
|---------------------------------------------------------------------------------|--------------------|------------------------|
| Age, median years (range)                                                       | 70 (49 – 92)       | 65 (31 – 84)           |
| Women, number (%)                                                               | 7 (47%)            | 1 (10%)                |
| Race, number (%)                                                                |                    |                        |
| African American                                                                | 12 (80%)           | 5 (50%)                |
| White                                                                           | 3 (20%)            | 4 (40%)                |
| Asian/Pacific Islander                                                          | 0                  | 1 (10%)                |
| Body Mass Index, mean (SD)                                                      | 33 (11)            | 29 (14)                |
| Sample Time, mean number days post diagnosis (SD)                               | 15 (12)            | 14 (13)                |
| Illness Severity, median WHO COVID ordinal scale (range)                        | 7 (5 – 8)          | N/A                    |
| Non-COVID Underlying Diagnosis, number (%)                                      | N/A                |                        |
| Sepsis                                                                          |                    | 4 (40%)                |
| ARDS                                                                            |                    | 5 (50%)                |
| Cerebrovascular Accident                                                        |                    | 1 (10%)                |
| Acute Leukemia                                                                  |                    | 1 (10%)                |
| Cardiogenic Shock                                                               |                    | 1 (10%)                |
| Interventions, number (%)                                                       |                    |                        |
| Renal-replacement therapy                                                       | 7 (47%)            | 2 (20%)                |
| Mechanical Ventilation                                                          | 13 (87%)           | 5 (50%)                |
| Vasopressor Support                                                             | 9 (60%)            | 4 (40%)                |
| Medications, number (%)                                                         |                    |                        |
| Therapeutic Anticoagulation                                                     | 11 (73%)           | 4 (40%)                |
| Dexamethasone                                                                   | 1 (7%)             | 3 (30%)                |
| Tocilizumab/Baricitinib/Remdesivir                                              | 0                  | 0                      |
| Hydroxychloroquine                                                              | 1 (7%)             | 0                      |
| Co-infections, number (%)                                                       |                    |                        |
| Bacterial Pneumonia                                                             | 1 (7%)             | 1 (10%)                |
| Fungal Pneumonia                                                                | 3 (20%)            | 2 (20%)                |
| Urinary Tract Infection                                                         | 1 (7%)             | 0                      |
| <i>Clostridium difficile</i> Colitis                                            | 1 (7%)             | 0                      |
| Co-morbidities                                                                  |                    |                        |
| Hypertension                                                                    | 11 (73%)           | 5 (50%)                |
| Diabetes mellitus                                                               | 9 (60%)            | 2 (20%)                |
| Renal Disease                                                                   | 4 (27%)            | 3 (30%)                |
| Obesity                                                                         | 6 (40%)            | 2 (20%)                |
| Asthma or COPD                                                                  | 2 (13%)            | 4 (40%)                |
| 30 Day Disposition (%)                                                          |                    |                        |
| Death/Hospice                                                                   | 5 (33%)            | 2 (20%)                |
| Hospitalized/Transfer (inpatient rehab, long term acute care or other facility) | 7 (47%)            | 1 (10%)                |
| Home                                                                            | 3 (20%)            | 7 (70%)                |

**Supplementary Dataset 1. Raw values for all unique features detected in lipidomic and metabolomic analyses for the adult cohort, available in the accompanying Source Data file.**

**Supplementary Dataset 2. Z normalized, knn imputed values for all unique features detected in lipidomic and metabolomic analyses for the adult cohort, available in the accompanying Source Data file.**

**Supplementary Dataset 3. Proteome discoverer table for adult proteomics experiments, available in the accompanying Source Data file.**

**Supplementary Table 2. Adult Proteomics Analysis Parameters.**

|                            |               |
|----------------------------|---------------|
| Number of protein groups   | 625           |
| Number of peptides         | 8,164         |
| Numbers od PSM             | 127,056       |
| Numbers of ms/ms spectra   | 1,471,228     |
| Percentage miss cleavage=0 | 62.46%        |
| Percentage miss cleavage=1 | 30.54%        |
| Percentage miss cleavage=2 | 7%            |
| PSM $\Delta$ M (PPM)       | 0.02 +/- 0.08 |

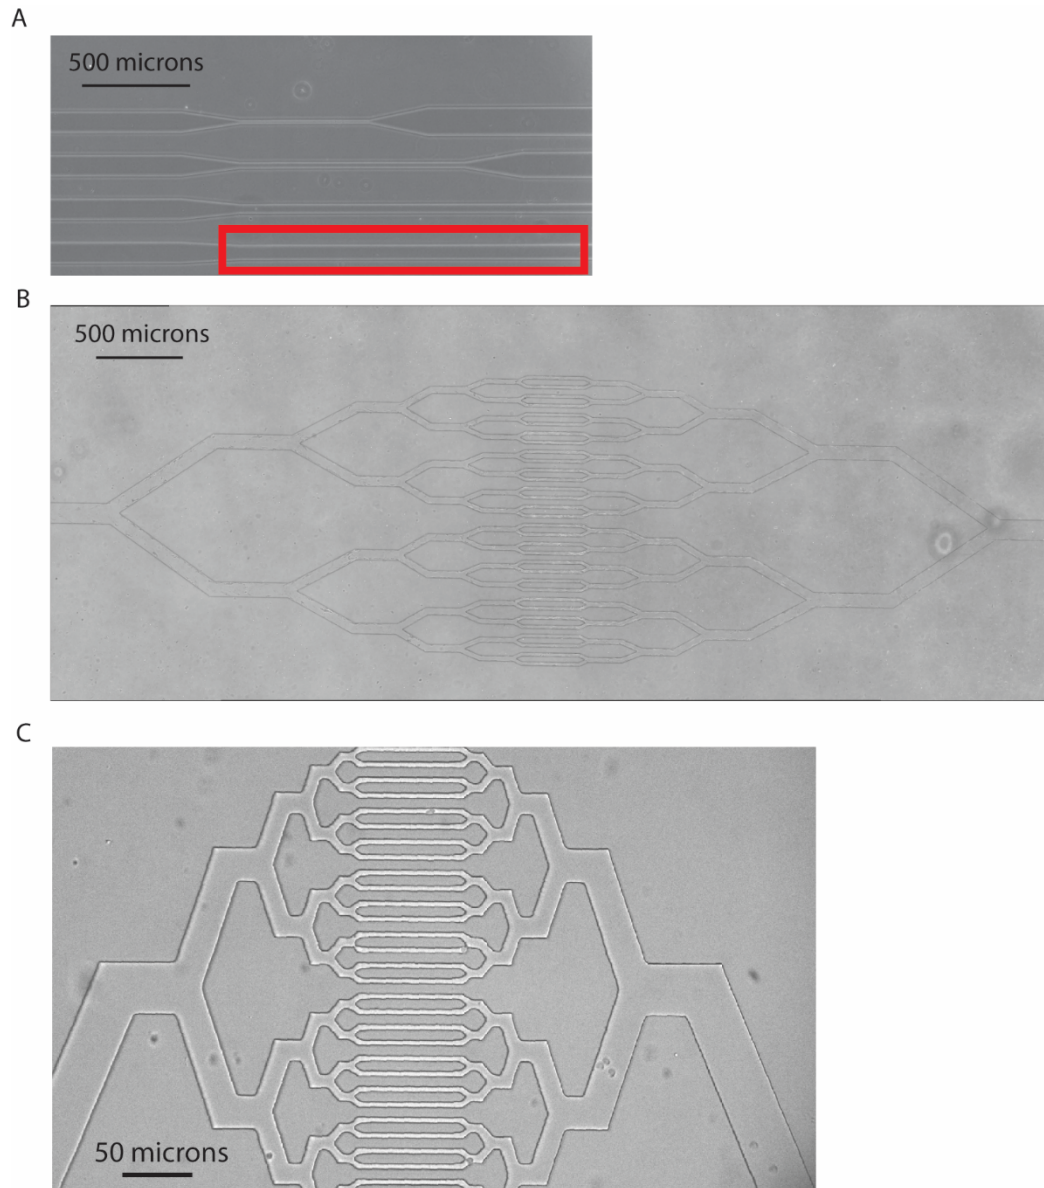

**Supplementary Figure 2. Overview of Microfluidics Devices Used in Experiments.** A.) Device used in aggregation assays consisting of parallel channels of varying sizes and uniform height of  $10\mu\text{m}$ ; the highlighted channel measures  $70\mu\text{m}$  in width and was used in the described assays. B) Device used for endothelialized experiments with serial branches to a central channel width of  $30\mu\text{m}$  and uniform  $30\mu\text{m}$  height. C) Device used for single cell deformability assays with serial branches to a central channel width of  $5\mu\text{m}$  and a uniform height of  $6\mu\text{m}$ .

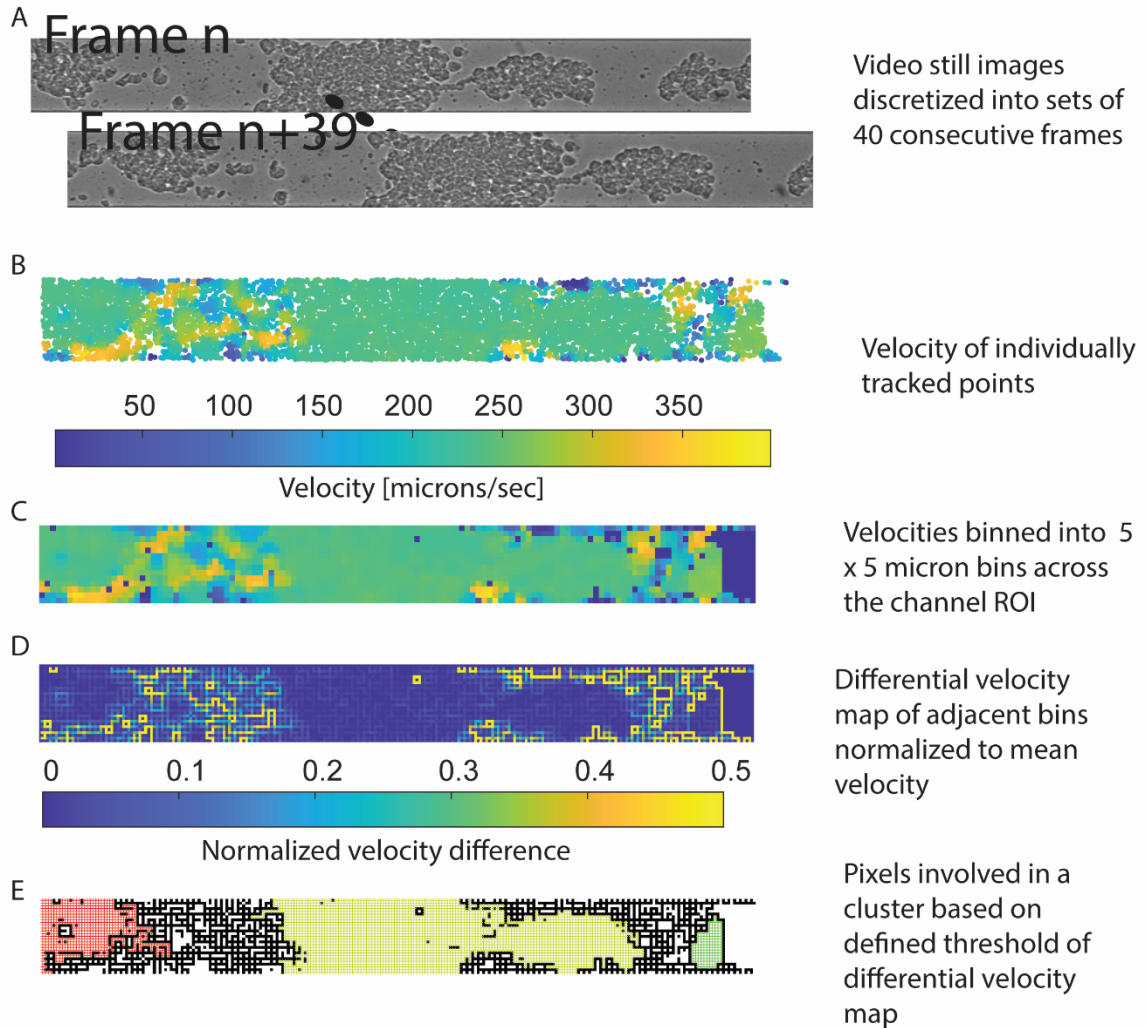

### Supplementary Figure 3. Detailed Explanation of DCVC Quantification Workflow.

A.) Ten seconds of video microscopy was captured at a frame rate of 160 frames per second yielding 1600 frames per sample. This time resolved frame sample was discretized into 40 sets of 40 frames, corresponding to 0.25 seconds per set for cell feature tracking. B.) Individual cell features were detected in the first frame of each set and tracked over the subsequent 39 frames using a built-in Matlab (Mathworks) object which employs the Kanade-Lucas-Tomasi tracking algorithm. A cell feature was only included in the analysis if it was detected in all 39 frames. Instantaneous velocity was calculated from each frame step and then averaged over all frames within a set. C.) To account for the difference in the number of cell features tracked per unit area the velocity field was binned into a matrix with bin size  $5\ \mu\text{m} \times 5\ \mu\text{m}$ , slightly smaller than the larger diameter of a single RBC. D.) The absolute difference in velocity between neighboring points in the binned velocity map were calculated and normalized to the average velocity for the set of images. E.) A black white image is created in which a threshold is applied to differential velocity map for a Boolean inclusion process of neighboring bins with  $<5\%$  difference in velocity. Groups of connected points are then identified using a connectivity map and included as a DCVC (red, yellow, green) if they were at least the area of 15 RBCs which corresponded to 115 pixels in the image set. The size of each DCVC is calculated and mapped to the binned velocity matrix in (C) to calculate the aggregate velocity.

**Supplementary Table 3. Patient Demographics for Adult Microfluidics Studies, n=29.**

|                                                                                 | COVID Cohort, n=13 | Sepsis Cohort, n=16 |
|---------------------------------------------------------------------------------|--------------------|---------------------|
| Age, median years (range)                                                       | 57 (24 – 84)       | 58 (19 – 81)        |
| Women, number (%)                                                               | 7 (54%)            | 4 (25%)             |
| Race, number (%)                                                                |                    |                     |
| African American                                                                | 12 (92%)           | 12 (75%)            |
| White                                                                           | 1 (8%)             | 4 (25%)             |
| Asian/Pacific Islander                                                          | 0 (0%)             | 0 (0%)              |
| Body Mass Index, mean (SD)                                                      | 33 (12)            | 28 (9)              |
| Sample Time, mean number days post diagnosis (SD)                               | 1.7 (0.7)          | 2.1 (0.7)           |
| Illness Severity, median SOFA ordinal scale (range)                             | 10 (3 – 19)        | 8.5 (5 – 15)        |
| Interventions, number (%)                                                       |                    |                     |
| Renal-replacement therapy                                                       | 5 (38%)            | 3 (19%)             |
| Mechanical Ventilation                                                          | 10 (77%)           | 15 (94%)            |
| Vasopressor Support                                                             | 9 (69%)            | 14 (87%)            |
| Medications, number (%)                                                         |                    |                     |
| Therapeutic Anticoagulation                                                     | 9 (69%)            | 3 (19%)             |
| Dexamethasone                                                                   | 13 (100%)          | 0 (0%)              |
| Tocilizumab/Baricitinib/Remdesivir                                              | 8 (62%)            | 0 (0%)              |
| Infectious Source, number (%)                                                   |                    |                     |
| Pneumonia                                                                       | 13 (100%)          | 8 (50%)             |
| Bacteremia                                                                      | 0                  | 5 (31%)             |
| Urinary Tract Infection                                                         | 0                  | 2 (13%)             |
| Skin and Soft Tissue Infection                                                  | 0                  | 1 (6%)              |
| Co-morbidities, number (%)                                                      |                    |                     |
| Hypertension                                                                    | 6 (46%)            | 8 (50%)             |
| Diabetes mellitus                                                               | 3 (23%)            | 5 (31%)             |
| Renal Disease                                                                   | 2 (15%)            | 3 (19%)             |
| Obesity                                                                         | 3 (23%)            | 5 (31%)             |
| Asthma or COPD                                                                  | 3 (23%)            | 7 (43%)             |
| 30 Day Disposition, number (%)                                                  |                    |                     |
| Death/Hospice                                                                   | 4 (31%)            | 8 (50%)             |
| Hospitalized/Transfer (inpatient rehab, long term acute care or other facility) | 5 (38%)            | 2 (13%)             |
| Home                                                                            | 4 (31%)            | 6 (37%)             |

**Supplementary Table 4. Patient Demographics for Pediatric Rheological Studies, n=25.**

|                                       | COVID, n=11         | MIS-C, n=14         |
|---------------------------------------|---------------------|---------------------|
| Age, median years (range)             | 15 (6-20)           | 9.5 (5-19)          |
| Girls, number (%)                     | 7 (64%)             | 6 (43%)             |
| Race/Ethnicity, number (%)            |                     |                     |
| African American/Non-Hispanic         | 4 (36%)             | 10 (71%)            |
| African American/Hispanic             | 1 (9%)              | 0                   |
| White/Non-Hispanic                    | 3 (27%)             | 0                   |
| White/Hispanic                        | 1 (9%)              | 1 (7%)              |
| Asian                                 | 2 (18%)             | 0                   |
| Declined/Non-Hispanic                 | 0                   | 1 (7%)              |
| Declined/Hispanic                     | 0                   | 2 (14%)             |
| Body Mass Index, mean (SD)            | 30 (14)             | 22 (8)              |
| COVID or MIS-C Symptom Severity       |                     |                     |
| Severe, number (%)                    | 11 (100%)           | 14 (100%)           |
| Immunocompromised State, number (%)   |                     |                     |
| None                                  | 9 (82%)             | 13 (93%)            |
| Malignancy                            | 2 (18%)             | 1 (7%)              |
| Medications                           |                     |                     |
| Anticoagulation                       | 8 (73%)             | 11 (79%)            |
| Dexamethasone or other steroid        | 8 (73%)             | 12 (86%)            |
| Tocilizumab/Baricitinib/Remdesivir    | 9 (82%)             | 2 (14%)             |
| IVIg                                  | 2 (18%)             | 13 (93%)            |
| Interventions                         |                     |                     |
| Mechanical Ventilation                | 1 (9%)              | 3 (21%)             |
| Vasopressor Support                   | 3 (27%)             | 12 (86%)            |
| ECMO                                  | 0                   | 1 (7%)              |
| Co-morbidities                        |                     |                     |
| Obesity                               | 5 (45%)             | 1 (7%)              |
| Asthma                                | 4 (36%)             | 2 (14%)             |
| Peak Fibrinogen, normal 200-393 mg/dL |                     |                     |
| Mean (SD)                             | 512 mg/dL (161)     | 662 mg/dL (189)     |
| Median (interquartile range)          | 485 mg/dL (422-630) | 640 mg/dL (524-736) |
| Discharge Disposition (%)             |                     |                     |
| Death/Hospice                         | 2 (18%)             | 1 (7%)              |
| Home                                  | 9 (82%)             | 13 (93%)            |

**Supplementary Table 5. Patient Demographics for Pediatric Multiomics Studies, n=19.**

|                                                           | COVID, n=7 | MIS-C, n=5 | Healthy, n=7 |
|-----------------------------------------------------------|------------|------------|--------------|
| Age, median years (range)                                 | 15 (3-16)  | 8 (5-19)   | 9 (5-12)     |
| Girls, number (%)                                         | 3 (43)     | 1 (20)     | 5 (71)       |
| Race/Ethnicity, number (%)                                |            |            |              |
| African American/Non-Hispanic                             | 3 (43%)    | 4 (80%)    | 5 (71%)      |
| White/Non-Hispanic                                        | 1 (14%)    | 0          | 2 (29%)      |
| Declined/Hispanic                                         | 3 (43%)    | 1 (20%)    | 0            |
| Body Mass Index, mean (SD)                                | 26 (12)    | 24 (7)     | Unknown      |
| Sample Time, mean number days post diagnosis (SD)         | 4 (3)      | 6 (4)      | N/A          |
| COVID or MIS-C Severity, median WHO ordinal scale (range) | 3 (2-5)    | 5 (4-7)    | N/A          |
| Immunocompromised State, number (%)                       |            |            | N/A          |
| None                                                      | 4 (57%)    | 4 (80%)    |              |
| Malignancy                                                | 3 (43%)    | 1 (20%)    |              |
| Medications                                               |            |            | N/A          |
| Anticoagulation                                           | 2 (29%)    | 3 (60%)    |              |
| Dexamethasone or other steroid                            | 1 (14%)    | 3 (60%)    |              |
| Tocilizumab/Baricitinib/Remdesivir                        | 3 (43%)    | 2 (40%)    |              |
| IVIg                                                      | 2 (29%)    | 1 (20%)    |              |
| Interventions                                             |            |            | N/A          |
| Mechanical Ventilation                                    | 0          | 2 (40%)    |              |
| Vasopressor Support                                       | 1 (14%)    | 4 (80%)    |              |
| ECMO                                                      | 0          | 0          |              |
| Co-morbidities                                            |            |            | N/A          |
| Obesity                                                   | 3 (43%)    | 0          |              |
| Asthma                                                    | 2 (29%)    | 1 (20%)    |              |
| Immunosuppressive therapy                                 | 3 (43%)    | 1 (20%)    |              |
| Co-infections                                             |            |            | N/A          |
| Acute appendicitis                                        | 1 (14%)    | 0          |              |
| Discharge Disposition (%)                                 |            |            | N/A          |
| Death/Hospice                                             | 1 (14%)    | 1 (20%)    |              |
| Home                                                      | 6 (86%)    | 4 (80%)    |              |



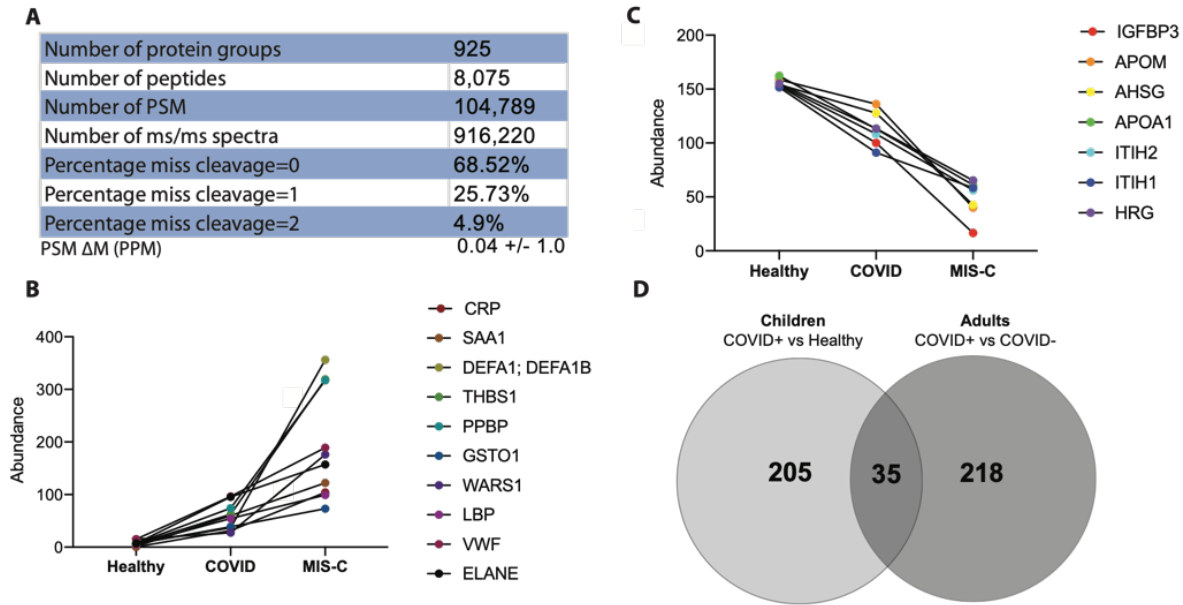

**Supplementary Figure 4. Pediatric analyte analysis.** A.) Table depicting the parameters of our pediatric cohort mass spectrometry run from number of proteins to the percentage of cleavages and average mass error ( $\Delta$ M) (parts per million (PPM)). B.) & C.) Proteins identified that trend with disease and could be diagnostic for alterations in MIS-C and COVID-19 in children. D.) Venn diagram of the significantly altered proteins (FDR <0.01), lipids and metabolites (p-value <0.05) when comparing the adult cohort (COVID+ versus (vs) COVID-) with the pediatric cohort (COVID+ vs Healthy). Analytes from (D) are listed individually in Supplementary Dataset 11. Source data are provided as a Source Data file.

**Supplementary Dataset 4. Proteome discoverer table for pediatric proteomics experiments, available in the accompanying Source Data file.**

**Supplementary Dataset 5. Raw values for all unique features detected in lipidomic and metabolomic analyses for the pediatric cohort, available in the accompanying Source Data file.**

**Supplementary Dataset 6. Z normalized, knn imputed values for all unique features detected lipidomic and metabolomic analyses for the pediatric cohort, available in the accompanying Source Data file.**

**Supplementary Dataset 7. Edged analysis for heat map of adult cohort, available in the accompanying Source Data file.**

**Supplementary Dataset 8. Edged analysis for heat map of pediatric cohort, available in the accompanying Source Data file.**

**Supplementary Dataset 9. Centrality analysis used to generate network plots of the adult cohort, available in the accompanying Source Data file.**

**Supplementary Dataset 10. Centrality analysis used to generate network plots of the pediatric cohort, available in the accompanying Source Data file.**

**Supplementary Table 6. Chromatography parameters for untargeted lipidomics.**

| Time (min) | A: 60:40 ACN:H2O | B: 90:10 IPA:ACN |
|------------|------------------|------------------|
| 0          | 60               | 40               |
| 0.2        | 60               | 40               |
| 1.5        | 40               | 60               |
| 6          | 30               | 70               |
| 9          | 15               | 85               |
| 11         | 0                | 100              |
| 12.5       | 0                | 100              |
| 13         | 60               | 40               |
| 15         | 60               | 40               |

**Supplementary Table 7. Mass spectrometry parameters for untargeted lipidomics.**

| Parameter                   | Setting                                                                                |
|-----------------------------|----------------------------------------------------------------------------------------|
| Ion Source Type             | H-ESI                                                                                  |
| Spray Voltage               | Static                                                                                 |
| Positive Ion (V)            | 3500 V                                                                                 |
| Negative Ion (V)            | 3500 V                                                                                 |
| Sheath Gas (arb. units)     | 50                                                                                     |
| Aux Gas (arb. units)        | 10                                                                                     |
| Sweep Gas (arb. units)      | 1                                                                                      |
| Ion Transfer Tube Temp (°C) | 300                                                                                    |
| Capillary Temp (°C)         | 275                                                                                    |
| S-Lens RF Level             | 40V                                                                                    |
| Data Acquisition Strategy   | Full scan and data dependent acquisition                                               |
| Full scan resolution (FWHM) | 120,000                                                                                |
| MS/MS resolution (FWHM)     | 30,000                                                                                 |
| HCD Fragmentation:          | Normalized collision energy (NCE) of 25, 35, 45, 55 eV<br>Stepped NCE of 10, 20, 50 eV |

**Supplementary Table 8. Lipid view parameters.**

|                                                                                                                                                                                                                                                                               |
|-------------------------------------------------------------------------------------------------------------------------------------------------------------------------------------------------------------------------------------------------------------------------------|
| <b>Identification</b>                                                                                                                                                                                                                                                         |
| <u>Database</u>                                                                                                                                                                                                                                                               |
| <ul style="list-style-type: none"> <li>Target database: General, HCD, CID, Labeled GPL, GL, SP, ChE</li> </ul>                                                                                                                                                                |
| <u>Peak Detection</u>                                                                                                                                                                                                                                                         |
| <ul style="list-style-type: none"> <li>Recalc Isotope: On</li> <li>R.T. Interval (min): 0.5</li> <li>R.T. Range (min): NA</li> </ul>                                                                                                                                          |
| <u>Search Options</u>                                                                                                                                                                                                                                                         |
| <ul style="list-style-type: none"> <li>ProductSearch_QEX</li> <li>SearchType: Product</li> <li>ExpType: LC</li> <li>Precursor Tol: 5.0 ppm</li> <li>Product Tol: 5.0 ppm</li> <li>Intensity Threshold: Relative; Product Ion 1.0 %</li> <li>m-Score Threshold: 2.0</li> </ul> |
| <b>Quantitation</b>                                                                                                                                                                                                                                                           |
| Execute Quantitation: On                                                                                                                                                                                                                                                      |
| Mz Tol: -0.5, +0.5                                                                                                                                                                                                                                                            |
| Tol Type: Da                                                                                                                                                                                                                                                                  |
| RT range (min): -0.1, +0.1                                                                                                                                                                                                                                                    |
| <b>Filters</b>                                                                                                                                                                                                                                                                |
| Top Rank Filter: On                                                                                                                                                                                                                                                           |

|                                        |
|----------------------------------------|
| Main node filter: All isomer peaks     |
| m-Score Threshold (Display): 5.0       |
| FA Priority: On                        |
| ID Quality Filter: A,B,C,D             |
| <b>Class</b>                           |
| Phospholipids:                         |
| • CL, Cardiolipin                      |
| • LPA, Lysophosphatidic Acid           |
| • PA, Phosphatidic Acid                |
| • LPC, Lysophosphatidylcholine         |
| • PC, phosphatidylcholine              |
| • LPE, Lysophosphatidylethanolamine    |
| • PE, Phosphatidylethanolamine         |
| • LPG, Lysophosphatidylglycerol        |
| • PG, Phosphatidylglycerol             |
| • LPI, Lysophosphatidylinositol        |
| • PI, Phosphatidylinositol             |
| • LPS, Lysophosphatidylserine          |
| • PS, Phosphatidylserine               |
| • PIP, Phosphatidylinositol            |
| • PIP2, Phosphatidylinositol           |
| • PIP3, Phosphatidylinositol           |
| Sphingolipids:                         |
| • Cer, Ceramides                       |
| • CerP, Ceramides Phosphate            |
| • CerPE, Ceramide Phosphoethanolamines |
| • Hex1Cer, Simple Glc Series           |
| • Hex2Cer, Simple Glc Series           |
| • Hex3Cer, Simple Glc Series           |
| • LSM, Lysosphingomyelin               |
| • SM, Sphingomyelin                    |
| • SPH, Sphingosine                     |
| • SPHP, Sphingosine phosphate          |
| Neutral Lipids:                        |
| • ChE, Cholesterol Ester               |
| • DG, Diglyceride                      |
| • MG, Monoglyceride                    |
| • TG, Triglyceride                     |
| Fatty Acyl and Other Lipids:           |
| • AcCa, Acyl Carnitine                 |
| • Co, Coenzyme                         |

|                                                                                     |
|-------------------------------------------------------------------------------------|
| <ul style="list-style-type: none"> <li>• FA, Fatty Acid</li> </ul>                  |
| <ul style="list-style-type: none"> <li>• PAF, Platelet Activating Factor</li> </ul> |
| <ul style="list-style-type: none"> <li>• AcylCoA, Acyl-coenzyme A</li> </ul>        |
| Fatty Acyl Carnitines:                                                              |
| <ul style="list-style-type: none"> <li>• CarE, Carnitine Esters</li> </ul>          |
| <b>Ion</b>                                                                          |
| <u>Adducts:</u>                                                                     |
| Negative:                                                                           |
| <ul style="list-style-type: none"> <li>• -H</li> </ul>                              |
| <ul style="list-style-type: none"> <li>• +HCOO</li> </ul>                           |
| <ul style="list-style-type: none"> <li>• +CH3COO</li> </ul>                         |
| <ul style="list-style-type: none"> <li>• -2H</li> </ul>                             |
| <ul style="list-style-type: none"> <li>• -CH3</li> </ul>                            |
| Positive:                                                                           |
| <ul style="list-style-type: none"> <li>• +H</li> </ul>                              |
| <ul style="list-style-type: none"> <li>• +NH4</li> </ul>                            |
| <ul style="list-style-type: none"> <li>• +Na</li> </ul>                             |
| <ul style="list-style-type: none"> <li>• +H-H2O</li> </ul>                          |
| <ul style="list-style-type: none"> <li>• +H-2H2O</li> </ul>                         |
| <ul style="list-style-type: none"> <li>• +2H</li> </ul>                             |
| <b>Alignment</b>                                                                    |
| Search Type: Product                                                                |
| Exp Type: LC-MS                                                                     |
| Alignment Method: Mean                                                              |
| RT Tolerance: 0.1                                                                   |
| Rate unassigned peak area: On                                                       |
| Filter Type: New Filter                                                             |
| Top rank Filter: On                                                                 |
| Main Node Filter: All isomer peaks                                                  |
| m-Score Threshold: 5.0                                                              |
| ID Quality Filter: A,B,C,D                                                          |

**Supplementary Table 9. Lipid search parameters.**

|                                                                                                                   |  |  |
|-------------------------------------------------------------------------------------------------------------------|--|--|
| <b>LipidView Analysis Method Details</b>                                                                          |  |  |
| Method Name = PrecQTrap                                                                                           |  |  |
|                                                                                                                   |  |  |
| APPLIES TO: QTRAP                                                                                                 |  |  |
| DATA:                                                                                                             |  |  |
| Data Processing: NL,PS                                                                                            |  |  |
| Polarity = Negative                                                                                               |  |  |
| Combine Multiple Periods & Exp's: USE                                                                             |  |  |
| MS/MS: Extract MS/MS Data                                                                                         |  |  |
|                                                                                                                   |  |  |
| SPECTRUM:                                                                                                         |  |  |
| NL,PS: Mass Tolerance = 0.5, Min % Intensity = 0.1, Minimum S/N = 3                                               |  |  |
| Mass Tolerance = 0.5, Min % Intensity = 0.1, Minimum S/N = 3                                                      |  |  |
| MS/MS: Fragments File = Fragments_neg, Mass Tolerance (Da) = 0.5, Spectrum Peaks > Noise* 3, Avg. Repl. Data: USE |  |  |
| Search m/z Range from 400 to 1200                                                                                 |  |  |
| Deisotope: USE                                                                                                    |  |  |
| Liquid Chromatography: Average Spectrum from 1 to 20 minutes                                                      |  |  |
|                                                                                                                   |  |  |
| LIPID DETAILS:                                                                                                    |  |  |
| Processing Method = Identify Species, Report Unidentified Peaks: USE                                              |  |  |
| Analysis Types:                                                                                                   |  |  |
| Glycerophospholipids, Sphingolipids                                                                               |  |  |
| Selected classes for each used analysis type:                                                                     |  |  |
| Glycerophospholipids:                                                                                             |  |  |
| PA, PC, PE, PG, PI, PS, CL, MMPE, DMPE                                                                            |  |  |
| Total Double Bonds <= 12                                                                                          |  |  |
| Lysospecies: USE                                                                                                  |  |  |
| Sphingolipids:                                                                                                    |  |  |
| SM, Cer                                                                                                           |  |  |
| Total Double Bonds <= 12                                                                                          |  |  |
| Nbr of OH groups: From 3 To 4                                                                                     |  |  |

**Supplementary Table 10. Chromatography parameters for polyunsaturated fatty acids.**

| Time (min) | 60:40 ACN:Water | 90:10 IPA: ACN |
|------------|-----------------|----------------|
| 0          | 80              | 20             |
| 2.0        | 80              | 20             |
| 2.1        | 60              | 40             |
| 10.0       | 30              | 70             |
| 10.1       | 0               | 100            |
| 15.0       | 0               | 100            |
| 15.1       | 80              | 20             |
| 18.0       | 80              | 20             |

**Supplementary Table 11. Mass spectrometry parameters for polyunsaturated fatty acids.**

|                               |                   |
|-------------------------------|-------------------|
|                               | Negative polarity |
| Curtain gas                   | 20 arb. units     |
| Collision Gas                 | Low               |
| IonSpray Voltage              | -4500 V           |
| Temperature                   | 650C              |
| Ion Source Gas 1              | 55 arb. units     |
| Ion Source Gas 2              | 60 arb. units     |
| Declustering Potential        | -90 arb. units    |
| Entrance Potential            | -10eV             |
| Collision Energy              | -30eV             |
| Collision Cell Exit Potential | -11eV             |

**Supplementary Table 12. Gradient parameters for chromatography analysis of oxylipins.**

| Time (min) | Percent A: 0.1% FA in water | Percent B: 0.1% FA in ACN |
|------------|-----------------------------|---------------------------|
| 0          | 90                          | 10                        |
| 0.5        | 90                          | 10                        |
| 1          | 50                          | 50                        |
| 2          | 50                          | 50                        |
| 2.1        | 25                          | 75                        |
| 5          | 25                          | 75                        |
| 7          | 15                          | 85                        |
| 12         | 15                          | 85                        |
| 12.1       | 0                           | 100                       |
| 14         | 0                           | 100                       |
| 15         | 90                          | 10                        |
| 16         | 90                          | 10                        |

**Supplementary Table 13. Gradient parameters for chromatography analysis of endocannabinoids.**

| Time (min) | Percent A: 0.1% FA in water | Percent B: 0.1% FA in ACN |
|------------|-----------------------------|---------------------------|
| 0          | 90                          | 10                        |
| 0.5        | 90                          | 10                        |
| 1          | 50                          | 50                        |
| 2          | 50                          | 50                        |
| 2.1        | 15                          | 85                        |
| 5          | 15                          | 85                        |
| 7          | 15                          | 85                        |
| 12         | 15                          | 85                        |

|      |    |    |
|------|----|----|
| 12.1 | 90 | 10 |
| 13.0 | 90 | 10 |

**Supplementary Table 14. Mass spectrometry parameters for acquisition of oxylipins and endocannabinoids.**

|                               | Negative polarity | Positive polarity |
|-------------------------------|-------------------|-------------------|
| Curtain gas                   | 20                | 20                |
| Collision Gas                 | Low               | Low               |
| IonSpray Voltage              | -4500             | 5000              |
| Temperature                   | 650               | 650               |
| Ion Source Gas 1              | 60                | 55                |
| Ion Source Gas 2              | 50                | 60                |
| Declustering Potential        | -200              | 90                |
| Entrance Potential            | -10               | 10                |
| Collision Energy              | -40               | 47                |
| Collision Cell Exit Potential | -11               | 18                |

**Supplementary Table 15. Mass spectrometry analysis of oxylipins and endocannabinoids.**

| LIPID                               | Q1 MASS | Q3 MASS |
|-------------------------------------|---------|---------|
| 9,10 DIHOME                         | 313.2   | 201.0   |
| PGE E2                              | 351.2   | 315.1   |
| 20- HETE                            | 319.2   | 289.2   |
| 9-HETE                              | 319.2   | 167.2   |
| 14,15 DHET                          | 337.2   | 207.0   |
| 5 HETE                              | 319.2   | 115.1   |
| 12 R-HETE                           | 319.2   | 179.1   |
| 11,12-DHET                          | 337.2   | 167.1   |
| 8,9-DHET                            | 337.2   | 127.2   |
| 5,6 EET                             | 319.2   | 191.1   |
| 5,6-DHET                            | 337.2   | 71.0    |
| TXB2                                | 369.2   | 169.1   |
| 12(13)-EPOME                        | 295.2   | 195.1   |
| 13 HODE                             | 295.2   | 195.1   |
| PGF2A                               | 353.2   | 193.3   |
| 14(15)-EET / 15-HETE                | 319.2   | 219.0   |
| LTB4                                | 335.2   | 195.1   |
| 8(9)-EET                            | 319.2   | 69.2    |
| 11(12)-EET                          | 319.2   | 167.1   |
| PGE2 Ethanolamide (PGE2-EA) 271.3   | 396.5   | 271.3   |
| Oleoyl Ethanolamide (OEA)           | 326.4   | 62.1    |
| Palmitoyl Ethanolamide              | 300.4   | 62.1    |
| ARA-Ethanolamide (AEA)              | 348.4   | 62.1    |
| Docosahexaenoyl Ethanolamide (DHEA) | 372.4   | 62.1    |



|                                         |        |       |
|-----------------------------------------|--------|-------|
| Linoleoyl Ethanolamide (LEA)            | 324.4  | 62.1  |
| Stearoyl Ethanolamide (ceramid)         | 328.4  | 62.1  |
| oxy-Arachidonoyl Ethanolamide (oxy-AEA) | 364    | 76    |
| 2-Arachidonoyl Glycerol (2AG) trans1    | 379.4  | 135   |
| Docosatetraenoyl Ethanolamide (DEA)     | 376.59 | 62.1  |
| alpha-linolenoyl ethanolamide(ALEA)     | 322.4  | 62.1  |
| oleamide                                | 282.5  | 247.4 |
| dihomo-gamma-linolenoyl ethanolamide    | 350.4  | 62.1  |
| docosanoyl ethanolamide                 | 384.5  | 62.1  |

**Supplementary Table 16. Chromatography parameters for untargeted metabolomics.**

| Time (min) | Solvent A: 0.1% FA in Water | Solvent B: 0.1% FA in ACN | Flow Rate (ml/min) |
|------------|-----------------------------|---------------------------|--------------------|
| -4.0       | 10                          | 90                        | 0.35               |
| 0          | 10                          | 90                        | 0.25               |
| 17.5       | 80                          | 20                        | 0.25               |
| 23.0       | 80                          | 20                        | 0.35               |
| 24.0       | 10                          | 90                        | 0.35               |

**Supplementary Table 17. Parameters used for data acquisition analysis in untargeted metabolomics.**

|            |               |                                 |        |
|------------|---------------|---------------------------------|--------|
| Sheath Gas | 40 arb. units | Electrospray Voltage (Positive) | 3000 V |
| Aux Gas    | 8 arb. units  | Electrospray Voltage (Negative) | 2750 V |
| Sweep Gas  | 1 arb. units  | Capillary Temp.                 | 275 °C |
| RF Level   | 50            | Probe Temp.                     | 320 °C |

**Supplementary Table 18. Compound discoverer parameters.**

|                   |                         | ADULT POS | ADULT NEG | PEDS POS  | PEDS NEG  |
|-------------------|-------------------------|-----------|-----------|-----------|-----------|
| <b>VERSION</b>    |                         |           |           | 3.2.0.421 | 3.2.0.421 |
| <b>GENERAL</b>    | SN Thresh               | 3         | 3         | 3         | 3         |
|                   | Min Peak Int            | 200k      | 200k      | 200k      | 200k      |
|                   | Max Peak Wid            | 0.5 min   | 0.5 min   | 0.5 min   | 0.5 min   |
|                   | Min # Scans/Peak        | 5         | 5         | 5         | 5         |
| <b>GROUP CPDS</b> | Mass Tol                | 5 ppm     | 5 ppm     | 5 ppm     | 5 ppm     |
|                   | RT Tol                  | 0.2 min   | 0.2 min   | 0.2 min   | 0.2 min   |
| <b>FILL GAPS</b>  | SNThresh                | 1.5       | 1.5       | 1.5       | 1.5       |
|                   | Use Real Peak Detection | TRUE      | TRUE      | TRUE      | TRUE      |
| <b>QC CORRE</b>   | Reg                     | Linear    | Linear    | Linear    | Linear    |
|                   | Min QC Cov              | 75        | 75        | 75        | 75        |
|                   | Max QC RSD              | 50        | 50        | 50        | 50        |

|                           |                     |       |       |       |       |
|---------------------------|---------------------|-------|-------|-------|-------|
|                           | Max Corr QC RSD     | 30    | 30    | 30    | 30    |
|                           | Files Between       | 20    | 20    | 20    | 20    |
| <b>MARK BGD</b>           | Max Sample/Blank    | 5     | 5     | 5     | 5     |
| <b>MASS LISTS</b>         | Mass Tol            | 7 ppm | 7 ppm | 5 ppm | 5 ppm |
|                           | Use RT              | TRUE  | TRUE  | TRUE  | TRUE  |
|                           | RT Tol              | 1 min | 1 min | 1 min | 1 min |
| <b>SEARCH<br/>MZCLOUD</b> | Match Factor Thresh | 60    | 60    | 60    | 60    |

**Supplementary Dataset 11. Overlap between differentially abundant species identified in Adult and Pediatric cohorts, available in the accompanying Source Data file.**

**Additional Supplementary Data is provided in the accompanying Source Data file.**
